# Supplementary material for: A facile approach toward transition metal oxide hierarchical structures and their lithium storage properties
Source: Royal Society of Chemistry journal article supplement (doi:10.1039/c2nr30525a), 2012-01-01
Supplement: c2nr30525a.pdf [file c2nr30525a.pdf]

## Supplementary Information

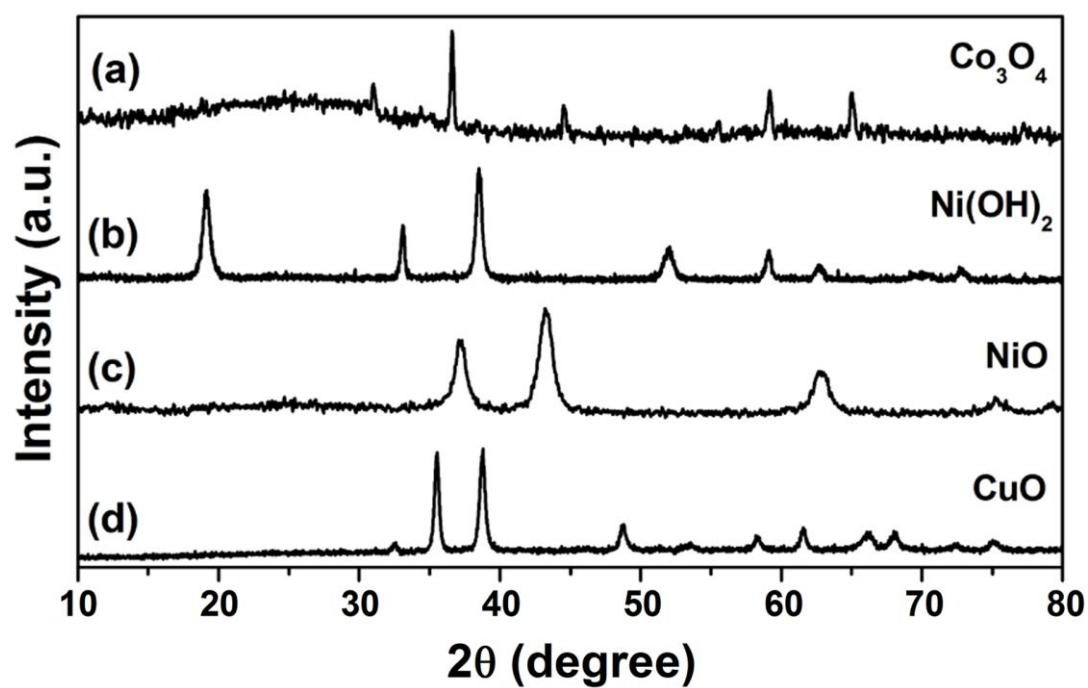

Fig. S1

Fig. S1 XRD patterns of as-synthesized transition metal oxide/ hydroxide samples, (a) Co<sub>3</sub>O<sub>4</sub>, (b) Ni(OH)<sub>2</sub>, (c) NiO, and (d) CuO.

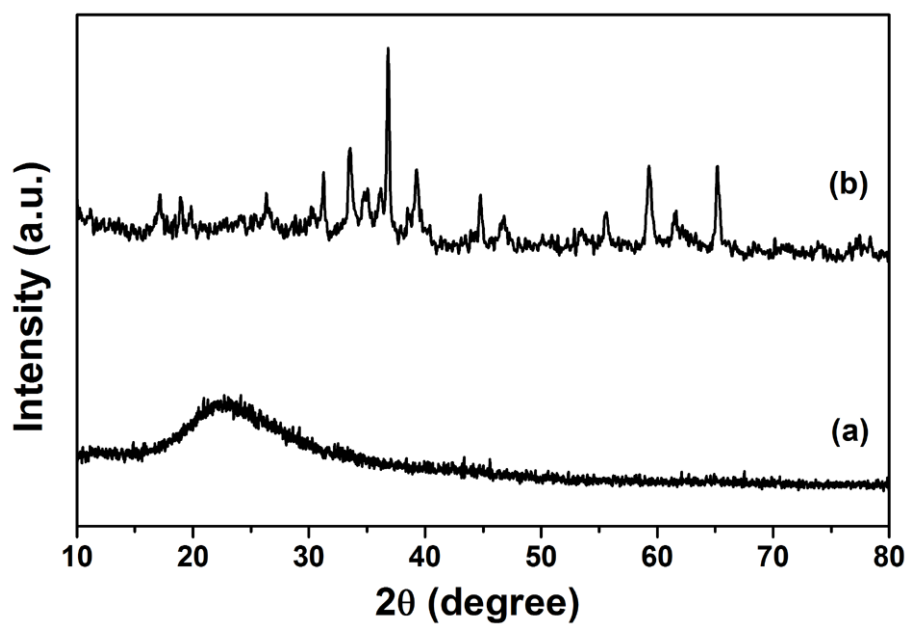

**Fig. S2**

Fig. S2 XRD patterns of Co-based products synthesized at 160 °C for different reaction time: (a) 3 and (b) 6.0 hours.

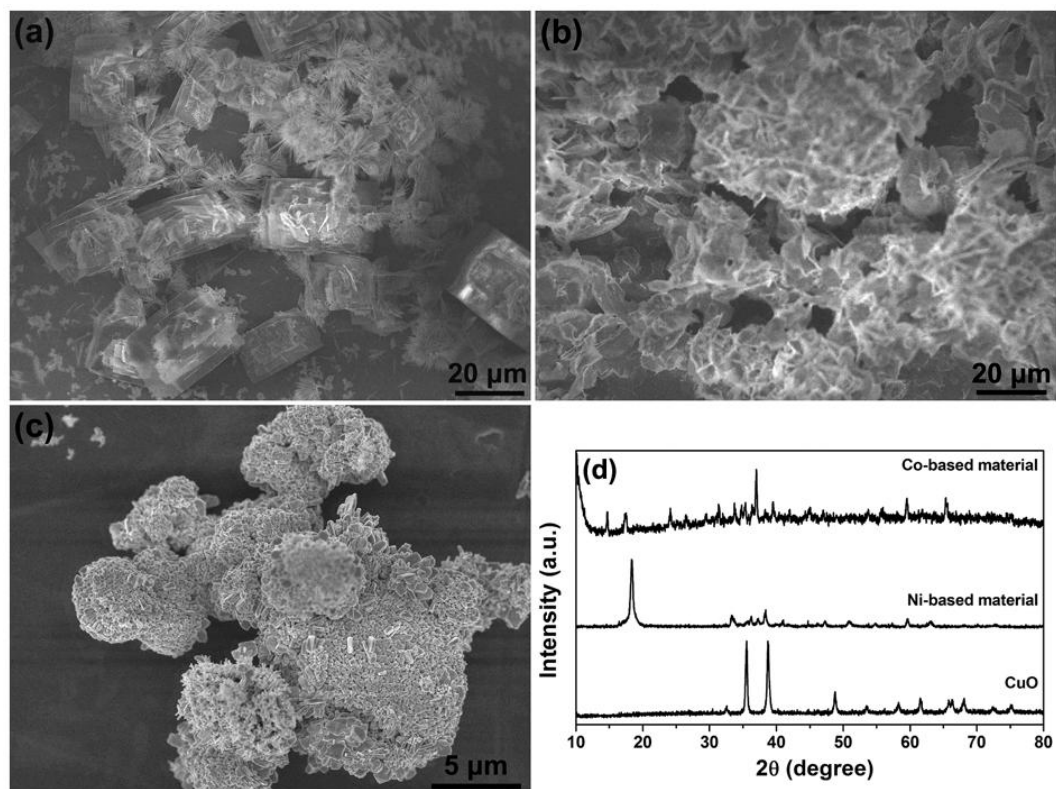

**Fig. S3**

Fig. S3 SEM images of (a) Co-based, (b) Ni-based, and (c) CuO products obtained by the conventional hydrothermal method and (d) corresponding XRD patterns for these products.

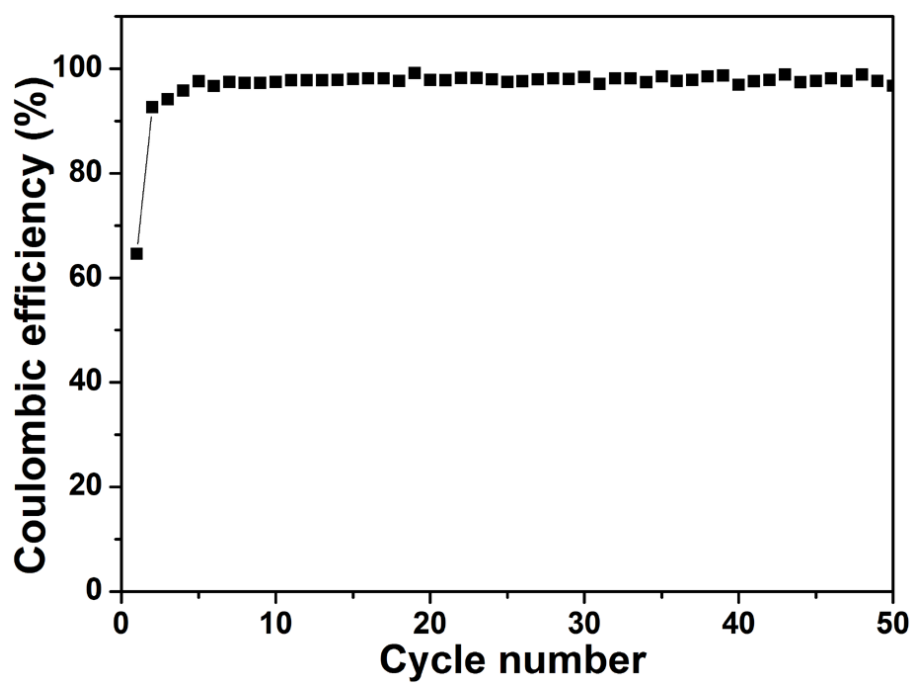

**Fig. S4**

Fig. S4 Coulombic efficiency of  $\text{Co}_3\text{O}_4$  hierarchical structures at the current density of 89 mA/g with a voltage window of 0.01–3.0 V.

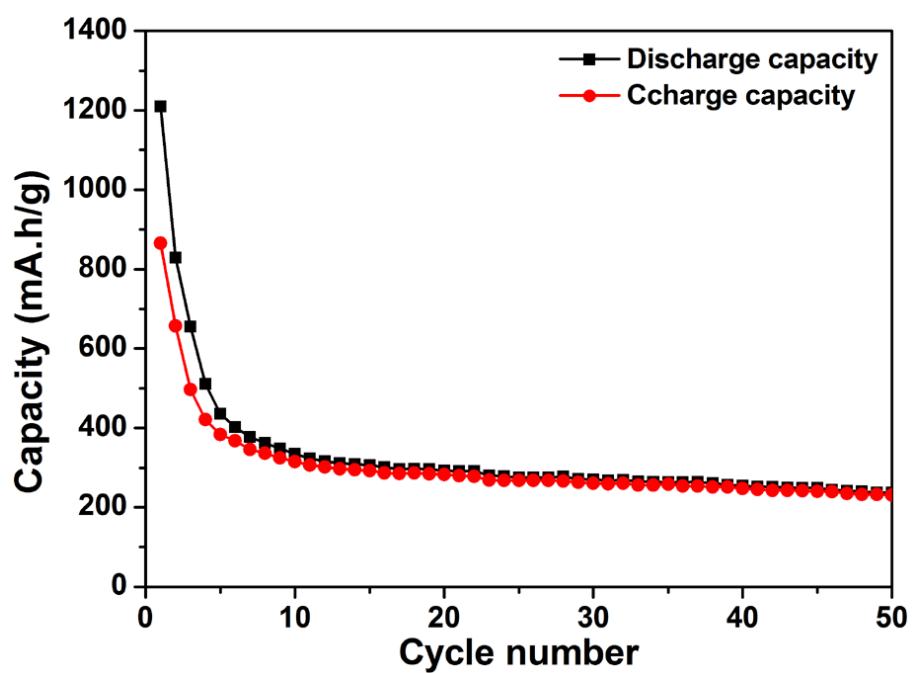

**Fig. S5**

Fig. S5 Cycling performance of Co-based material prepared by the conventional hydrothermal method at a current density of 89 mA/g with a voltage window of 0.01–3.0 V.

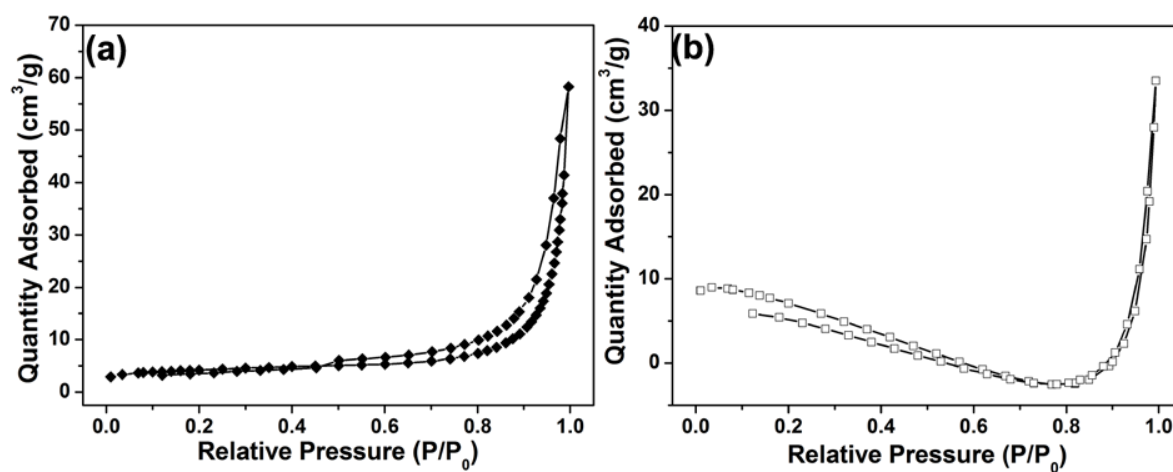

**Fig. S6**

Fig. S6 Nitrogen adsorption and desorption isotherms for (a) the Co<sub>3</sub>O<sub>4</sub> hierarchical structures synthesized through the modified hydrothermal process; (b) Co<sub>3</sub>O<sub>4</sub> obtained through the conventional hydrothermal method.

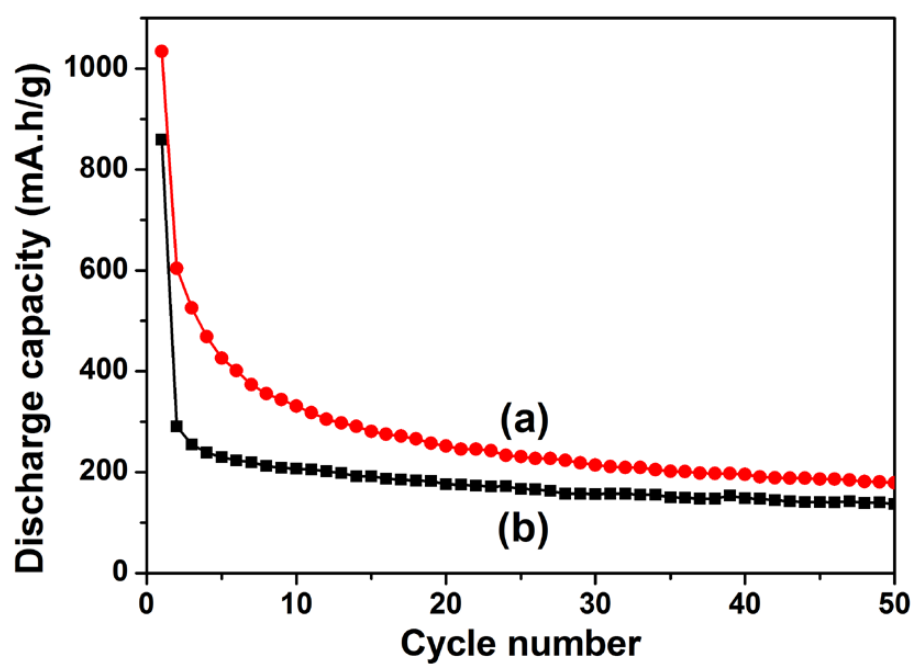

**Fig. S7**

Fig. S7 Cycling performances of (a) NiO and (b) CuO samples, obtained through the conventional hydrothermal method, at 0.1 C, e.g (a) 72 mA/g and (b) 67 mA/g, within a voltage window of 0.01–3.0 V, respectively.
